# Supplementary material for: Dataset AqADAPT: Physicochemical Parameters, Vibrio Abundance, and Species Determination in Water Columns of Two Adriatic Sea Aquaculture Sites
Source: MDPI journal article supplement (doi:10.3390/data8030055), 2023-03-03
Supplement: s1 [file s1]

## Supplementary Information

Purgar and Kapetanović et al. 2023: Dataset AqADAPT: Physicochemical parameters, *Vibrio* abundance, and species determination in water column of two Adriatic Sea aquaculture sites

Table S1: Limit of detection and determination of the tested water quality indicators.

| Indicator                       | Limit detection                              |
|---------------------------------|----------------------------------------------|
| Temperature                     | 0.1 °C                                       |
| Salinity                        | 0.01 ppt                                     |
| TDS                             | 1 mg/L                                       |
| pH                              | 0.01 units                                   |
| Dissolved Oxygen (% saturation) | 0.1 %                                        |
| Conductivity                    | 1 µS/cm                                      |
| Transparency                    | 0.5 m                                        |
| Nitrates                        | 0.01 mgN/L                                   |
| Nitrites                        | 0.001 mgN/L                                  |
| Ammonia                         | 0.01 mgN/L                                   |
| Total phosphorus                | 0.001 mgP/L                                  |
| Total nitrogen                  | 0.1 mgN/L                                    |
| Total particulate matter        | Determined according to Paterson et al. 2003 |
| Particulate organic matter      | Determined according to Paterson et al. 2003 |
| Particulate inorganic matter    | Determined according to Paterson et al. 2003 |
| <i>Vibrio</i> spp.              | 1 CFU/1mL                                    |
| HPC                             | 1 CFU/1mL                                    |
| Total coliforms                 | 1 organism/100mL                             |
| <i>E. coli</i>                  | 1 organism/100mL                             |
| Enterococci                     | 1 organism/100mL                             |

Table S2: Measured abundances of: heterotrophic (total) bacteria (HPC), total coliforms (TC), *E. coli* and enterococci for each sampling site (Cres - Control, Cres - Fish Farm, Vrgada - Control and Vrgada - Fish Farm).

| Date     | Season | Location           | Depth   | HPC (CFU/ml) | TC (MPN/100mL) | <i>E. coli</i> (MPN/100mL) | Enterococci (MPN/100mL) |
|----------|--------|--------------------|---------|--------------|----------------|----------------------------|-------------------------|
| 1.7.2019 | Summer | Vrgada - Fish Farm | Surface | 220          | 88             | 25,5                       | 10                      |
| 1.7.2019 | Summer | Vrgada - Fish Farm | 6m      | 260          | 81,5           | 10                         | <10,0                   |
| 1.7.2019 | Summer | Vrgada - Fish Farm | 12m     | 780          | 20             | 10                         | <10,0                   |
| 1.7.2019 | Summer | Vrgada - Fish Farm | Bottom  | 660          | 20,5           | <10,0                      | <10,0                   |
| 1.7.2019 | Summer | Cres - Fish Farm   | Surface | 90           | 487,0          | <10,0                      | <10,0                   |

|            |        |                    |         |       |        |        |        |
|------------|--------|--------------------|---------|-------|--------|--------|--------|
| 1.7.2019   | Summer | Cres - Fish Farm   | 6m      | 545   | 588,0  | <10,0  | <10,0  |
| 1.7.2019   | Summer | Cres - Fish Farm   | 12m     | 295   | 1034   | <10,0  | <10,0  |
| 1.7.2019   | Summer | Cres - Fish Farm   | Bottom  | 185   | 10     | <10,0  | <10,0  |
| 10.12.2019 | Autumn | Vrgada - Fish Farm | Surface | 960   | <10,0  | <10,0  | <10,0  |
| 10.12.2019 | Autumn | Vrgada - Fish Farm | 6m      | 960   | <10,0  | <10,0  | <10,0  |
| 10.12.2019 | Autumn | Vrgada - Fish Farm | 12m     | 1760  | <10,0  | <10,0  | <10,0  |
| 10.12.2019 | Autumn | Vrgada - Fish Farm | Bottom  | 290   | <10,0  | <10,0  | 20     |
| 16.7.2020  | Summer | Cres - Fish Farm   | Surface | 2800  | 1239,0 | < 10,0 | 10,0   |
| 16.7.2020  | Summer | Cres - Fish Farm   | 6m      | 3800  | 410,0  | < 10,0 | < 10,0 |
| 16.7.2020  | Summer | Cres - Fish Farm   | 12m     | 6800  | 75     | < 10,0 | < 10,0 |
| 16.7.2020  | Summer | Cres - Fish Farm   | Bottom  | 28800 | 10     | < 10,0 | < 10,0 |
| 16.7.2020  | Summer | Cres - Control     | Surface | 5000  | < 10,0 | < 10,0 | < 10,0 |
| 16.7.2020  | Summer | Cres - Control     | 6m      | 10100 | < 10,0 | < 10,0 | < 10,0 |
| 16.7.2020  | Summer | Cres - Control     | 12m     | 2300  | < 10,0 | < 10,0 | < 10,0 |
| 16.7.2020  | Summer | Cres - Control     | Bottom  | 1100  | < 10,0 | < 10,0 | < 10,0 |
| 18.7.2020  | Summer | Vrgada - Fish Farm | Surface | 30800 | 63     | <10,0  | <10,0  |
| 18.7.2020  | Summer | Vrgada - Fish Farm | 6m      | 1600  | <10,0  | <10,0  | <10,0  |
| 18.7.2020  | Summer | Vrgada - Fish Farm | 12m     | 5600  | 20     | <10,0  | <10,0  |
| 18.7.2020  | Summer | Vrgada - Fish Farm | Bottom  | 3500  | 441    | <10,0  | <10,0  |
| 18.7.2020  | Summer | Vrgada - Control   | Surface | 8600  | <10,0  | <10,0  | <10,0  |
| 18.7.2020  | Summer | Vrgada - Control   | 6m      | 2700  | <10,0  | <10,0  | <10,0  |
| 18.7.2020  | Summer | Vrgada - Control   | 12m     | 18300 | 20     | <10,0  | <10,0  |
| 18.7.2020  | Summer | Vrgada - Control   | Bottom  | 13900 | 86     | <10,0  | <10,0  |
| 7.10.2020  | Autumn | Cres - Fish Farm   | Surface | 9800  | 110,0  | <10,0  | <10,0  |
| 7.10.2020  | Autumn | Cres - Fish Farm   | 6m      | 29000 | 243,0  | <10,0  | <10,0  |
| 7.10.2020  | Autumn | Cres - Fish Farm   | 12m     | 19000 | 227    | <10,0  | <10,0  |
| 7.10.2020  | Autumn | Cres - Fish Farm   | Bottom  | 6300  | <10,0  | <10,0  | <10,0  |
| 7.10.2020  | Autumn | Cres - Control     | Surface | 20500 | 10     | <10,0  | <10,0  |
| 7.10.2020  | Autumn | Cres - Control     | 6m      | 10900 | <10,0  | <10,0  | <10,0  |
| 7.10.2020  | Autumn | Cres - Control     | 12m     | 8200  | 738    | <10,0  | <10,0  |

|           |        |                    |         |       |       |       |       |
|-----------|--------|--------------------|---------|-------|-------|-------|-------|
| 7.10.2020 | Autumn | Cres - Control     | Bottom  | 1300  | 1467  | <10,0 | <10,0 |
| 5.10.2020 | Autumn | Vrgada - Fish Farm | Surface | 3400  | 408   | <10,0 | <10,0 |
| 5.10.2020 | Autumn | Vrgada - Fish Farm | 6m      | 600   | 933   | 30    | <10,0 |
| 5.10.2020 | Autumn | Vrgada - Fish Farm | 12m     | 1400  | 1376  | 41    | <10,0 |
| 5.10.2020 | Autumn | Vrgada - Fish Farm | Bottom  | 800   | 933   | 10    | <10,0 |
| 5.10.2020 | Autumn | Vrgada - Control   | Surface | 2100  | 155   | <10,0 | <10,0 |
| 5.10.2020 | Autumn | Vrgada - Control   | 6m      | 2100  | 226   | 10    | <10,0 |
| 5.10.2020 | Autumn | Vrgada - Control   | 12m     | 400   | 537   | <10,0 | <10,0 |
| 5.10.2020 | Autumn | Vrgada - Control   | Bottom  | 7600  | 364   | <10,0 | <10,0 |
| 17.2.2021 | Winter | Cres - Fish Farm   | Surface | 16000 | <10,0 | <10,0 | <10,0 |
| 17.2.2021 | Winter | Cres - Fish Farm   | 6m      | 26600 | <10,0 | <10,0 | <10,0 |
| 17.2.2021 | Winter | Cres - Fish Farm   | 12m     | 9900  | <10,0 | <10,0 | <10,0 |
| 17.2.2021 | Winter | Cres - Fish Farm   | Bottom  | 200   | <10,0 | <10,0 | <10,0 |
| 17.2.2021 | Winter | Cres - Control     | Surface | 36500 | <10,0 | <10,0 | <10,0 |
| 17.2.2021 | Winter | Cres - Control     | 6m      | 10700 | <10,0 | <10,0 | <10,0 |
| 17.2.2021 | Winter | Cres - Control     | 12m     | 12500 | <10,0 | <10,0 | <10,0 |
| 17.2.2021 | Winter | Cres - Control     | Bottom  | 25200 | <10,0 | <10,0 | <10,0 |
| 15.2.2021 | Winter | Vrgada - Fish Farm | Surface | 36800 | <10,0 | <10,0 | <10,0 |
| 15.2.2021 | Winter | Vrgada - Fish Farm | 6m      | 18700 | <10,0 | <10,0 | <10,0 |
| 15.2.2021 | Winter | Vrgada - Fish Farm | 12m     | 19200 | <10,0 | <10,0 | <10,0 |
| 15.2.2021 | Winter | Vrgada - Fish Farm | Bottom  | 39800 | <10,0 | <10,0 | <10,0 |
| 15.2.2021 | Winter | Vrgada - Control   | Surface | 28900 | <10,0 | <10,0 | <10,0 |
| 15.2.2021 | Winter | Vrgada - Control   | 6m      | 500   | <10,0 | <10,0 | <10,0 |
| 15.2.2021 | Winter | Vrgada - Control   | 12m     | 1900  | <10,0 | <10,0 | <10,0 |
| 15.2.2021 | Winter | Vrgada - Control   | Bottom  | 300   | <10,0 | <10,0 | <10,0 |
| 28.4.2021 | Spring | Cres - Fish Farm   | Surface | 550   | <10,0 | <10,0 | <10,0 |
| 28.4.2021 | Spring | Cres - Fish Farm   | 6m      | 50    | <10,0 | <10,0 | <10,0 |
| 28.4.2021 | Spring | Cres - Fish Farm   | 12m     | 1450  | <10,0 | <10,0 | <10,0 |
| 28.4.2021 | Spring | Cres - Fish Farm   | Bottom  | 450   | <10,0 | <10,0 | <10,0 |
| 28.4.2021 | Spring | Cres - Control     | Surface | 4500  | <10,0 | <10,0 | <10,0 |

|           |        |                    |         |       |       |       |       |
|-----------|--------|--------------------|---------|-------|-------|-------|-------|
| 28.4.2021 | Spring | Cres - Control     | 6m      | 950   | <10,0 | <10,0 | <10,0 |
| 28.4.2021 | Spring | Cres - Control     | 12m     | 900   | <10,0 | <10,0 | <10,0 |
| 28.4.2021 | Spring | Cres - Control     | Bottom  | 2400  | <10,0 | <10,0 | <10,0 |
| 27.4.2021 | Spring | Vrgada - Fish Farm | Surface | 2100  | <10,0 | <10,0 | <10,0 |
| 27.4.2021 | Spring | Vrgada - Fish Farm | 6m      | 750   | <10,0 | <10,0 | <10,0 |
| 27.4.2021 | Spring | Vrgada - Fish Farm | 12m     | 500   | <10,0 | <10,0 | <10,0 |
| 27.4.2021 | Spring | Vrgada - Fish Farm | Bottom  | 250   | <10,0 | <10,0 | <10,0 |
| 27.4.2021 | Spring | Vrgada - Control   | Surface | 3900  | <10,0 | <10,0 | <10,0 |
| 27.4.2021 | Spring | Vrgada - Control   | 6m      | 2500  | <10,0 | <10,0 | <10,0 |
| 27.4.2021 | Spring | Vrgada - Control   | 12m     | 10500 | <10,0 | <10,0 | <10,0 |
| 27.4.2021 | Spring | Vrgada - Control   | Bottom  | 2750  | <10,0 | <10,0 | <10,0 |
| 1.7.2021  | Summer | Cres - Fish Farm   | Surface | 17550 | 937   | 70    | <10.0 |
| 1.7.2021  | Summer | Cres - Fish Farm   | 6m      | 2950  | 1235  | 105   | <10.0 |
| 1.7.2021  | Summer | Cres - Fish Farm   | 12m     | 8350  | 1095  | 100   | <10.0 |
| 1.7.2021  | Summer | Cres - Fish Farm   | Bottom  | 20800 | 469   | 51    | <10.0 |
| 1.7.2021  | Summer | Cres - Control     | Surface | 11650 | 1075  | 10    | <10.0 |
| 1.7.2021  | Summer | Cres - Control     | 6m      | 20450 | 144   | 10    | <10.0 |
| 1.7.2021  | Summer | Cres - Control     | 12m     | 39200 | 1010  | <10.0 | <10.0 |
| 1.7.2021  | Summer | Cres - Control     | Bottom  | 3850  | 350   | 41    | <10.0 |
| 3.7.2021  | Summer | Vrgada - Fish Farm | Surface | 14000 | 720   | 30    | <10.0 |
| 3.7.2021  | Summer | Vrgada - Fish Farm | 6m      | 18150 | 787   | 10    | <10.0 |
| 3.7.2021  | Summer | Vrgada - Fish Farm | 12m     | 4600  | 898   | 31    | <10.0 |
| 3.7.2021  | Summer | Vrgada - Fish Farm | Bottom  | 8000  | 937   | 73    | <10.0 |
| 3.7.2021  | Summer | Vrgada - Control   | Surface | 6000  | 1055  | 108   | <10.0 |
| 3.7.2021  | Summer | Vrgada - Control   | 6m      | 750   | 975   | 10    | <10.0 |
| 3.7.2021  | Summer | Vrgada - Control   | 12m     | 1800  | 663   | 20    | <10.0 |
| 3.7.2021  | Summer | Vrgada - Control   | Bottom  | 700   | 1075  | 119   | <10.0 |
| 25.8.2021 | Summer | Cres - Fish Farm   | Surface | 1050  | 51    | <10.0 | <10.0 |
| 25.8.2021 | Summer | Cres - Fish Farm   | 6m      | 6100  | <10.0 | <10.0 | <10.0 |
| 25.8.2021 | Summer | Cres - Fish Farm   | 12m     | 1800  | <10.0 | <10.0 | <10.0 |

|           |        |                    |         |      |       |       |       |
|-----------|--------|--------------------|---------|------|-------|-------|-------|
| 25.8.2021 | Summer | Cres - Fish Farm   | Bottom  | 250  | <10.0 | <10.0 | 10    |
| 25.8.2021 | Summer | Cres - Control     | Surface | 2350 | <10.0 | <10.0 | <10.0 |
| 25.8.2021 | Summer | Cres - Control     | 6m      | 1600 | <10.0 | <10.0 | <10.0 |
| 25.8.2021 | Summer | Cres - Control     | 12m     | 1200 | <10.0 | <10.0 | <10.0 |
| 25.8.2021 | Summer | Cres - Control     | Bottom  | 300  | <10.0 | <10.0 | <10.0 |
| 24.8.2021 | Summer | Vrgada - Fish Farm | Surface | 1000 | <10.0 | <10.0 | <10.0 |
| 24.8.2021 | Summer | Vrgada - Fish Farm | 6m      | 500  | 307   | 20    | <10.0 |
| 24.8.2021 | Summer | Vrgada - Fish Farm | 12m     | 350  | 744   | 199   | <10.0 |
| 24.8.2021 | Summer | Vrgada - Fish Farm | Bottom  | 200  | 30    | <10.0 | <10.0 |
| 24.8.2021 | Summer | Vrgada - Control   | Surface | 2700 | 151   | <10.0 | 10    |
| 24.8.2021 | Summer | Vrgada - Control   | 6m      | 1900 | <10.0 | <10.0 | <10.0 |
| 24.8.2021 | Summer | Vrgada - Control   | 12m     | 250  | <10.0 | <10.0 | <10.0 |
| 24.8.2021 | Summer | Vrgada - Control   | Bottom  | 6200 | <10.0 | <10.0 | <10.0 |

Table S3: Results of molecular identification of bacterial isolates from the Cres - Fish Farm (Ramlijak et al. 2022).

| Sample type                                              | Skin<br>(n=28) |      | Seawater<br>(n=32) |      | Sediment<br>(n=21) |      |
|----------------------------------------------------------|----------------|------|--------------------|------|--------------------|------|
| Species (percent identity, %)                            | No.            | %    | No.                | %    | No.                | %    |
| <i>Alcaligenes faecalis</i> (97,97 %)                    | 1              | 3,6  |                    |      |                    |      |
| <i>Aliivibrio finisterrensis</i> (99,05 %)               |                |      | 1                  | 3,1  |                    |      |
| <i>Alteromonas macleodii</i> (99,61 %)                   |                |      | 2                  | 6,3  |                    |      |
| <i>Bacillus aquimaris</i> (99,71-99,81 %)                |                |      |                    |      | 7                  | 33,3 |
| <i>Bacillus horikoshii</i> (99,62 %)                     |                |      |                    |      | 1                  | 4,8  |
| <i>Bacillus hwajinpoensis</i> (99,44-100,00 %)           | 2              | 7,1  |                    |      | 3                  | 14,3 |
| <i>Bacillus idriensis</i> (99,81 %)                      |                |      |                    |      | 1                  | 4,8  |
| <i>Bacillus tianshenii</i> (99,71 %)                     |                |      |                    |      | 1                  | 4,8  |
| <i>Microbacterium oxydans</i> (99,61 %)                  | 1              | 3,6  |                    |      |                    |      |
| <i>Paenisporosarcina quisquiliarum</i> (99,52 %)         |                |      |                    |      | 1                  | 4,8  |
| <i>Photobacterium aphoticum</i> (99,04-99,90 %)          |                |      |                    |      | 4                  | 19,0 |
| <i>Pseudoalteromonas arabiensis</i> (99,22-99,52 %)      | 3              | 10,7 |                    |      |                    |      |
| <i>Pseudoalteromonas hodoensis</i> (99,52 %)             |                |      | 1                  | 3,1  |                    |      |
| <i>Pseudoalteromonas phenolica</i> (99,81 %)             |                |      | 1                  | 3,1  |                    |      |
| <i>Pseudoalteromonas shioyasakiensis</i> (99,42-99,71 %) |                |      | 3                  | 9,4  |                    |      |
| <i>Pseudoalteromonas tetraodonis</i> (99,72-99,90 %)     |                |      | 3                  | 9,4  |                    |      |
| <i>Pseudoalteromonas undina</i> (100,00 %)               | 1              | 3,6  |                    |      |                    |      |
| <i>Pseudochrobactrum saccharolyticum</i> (98,92-99,53 %) | 4              | 14,3 |                    |      |                    |      |
| <i>Pseudomonas zhaodongensis</i> (99,42 %)               | 1              | 3,6  |                    |      |                    |      |
| <i>Shewanella marinintestina</i> (99,91 %)               |                |      |                    |      | 1                  | 4,8  |
| <i>Vibrio alginolyticus</i> (99,60-100,00 %)             | 5              | 17,9 | 2                  | 6,3  |                    |      |
| <i>Vibrio chagasii</i> (98,21-98,87 %)                   |                |      | 6                  | 18,8 |                    |      |
| <i>Vibrio crassostreae</i> (99,14 %)                     |                |      | 1                  | 3,1  |                    |      |
| <i>Vibrio cyclitrophicus</i> (99,47-100,00 %)            | 4              | 14,3 |                    |      |                    |      |
| <i>Vibrio europaeus</i> (99,79 %)                        |                |      | 1                  | 3,1  |                    |      |
| <i>Vibrio fortis</i> (99,18-99,33 %)                     |                |      | 2                  | 6,3  |                    |      |
| <i>Vibrio gigantis</i> (99,61 %)                         |                |      | 1                  | 3,1  |                    |      |
| <i>Vibrio harveyi</i> (99,71-100,00 %)                   | 4              | 14,3 | 1                  | 3,1  |                    |      |
| <i>Vibrio hyugaensis</i> (99,71 %)                       |                |      | 1                  | 3,1  |                    |      |
| <i>Vibrio kanaloae</i> (99,23-100,00 %)                  |                |      | 3                  | 9,4  |                    |      |
| <i>Vibrio neocaledonicus</i> (99,80-99,81 %)             | 2              | 7,1  |                    |      |                    |      |
| <i>Vibrio toranzoniae</i> (98,55-99,90 %)                |                |      |                    |      | 2                  | 9,5  |
| <i>Vibrio tubiashii</i> (96,18-99,32 %)                  |                |      | 3                  | 9,4  |                    |      |

Table S4: Results of molecular identification of bacterial isolates from the Vrgada - Fish Farm (Ramljak et al. 2022).

| Sample type                                       | Skin<br>(n=20) |    | Seawater<br>(n=22) |      | Sediment<br>(n=22) |      |
|---------------------------------------------------|----------------|----|--------------------|------|--------------------|------|
| Species (percent identity, %)                     | No.            | %  | No.                | %    | No.                | %    |
| <i>Achromobacter spanius</i> (98,75 %)            | 1              | 5  |                    |      |                    |      |
| <i>Aeromonas molluscorum</i> (99,71 %)            | 1              | 5  |                    |      |                    |      |
| <i>Agrococcus</i> sp. (98,94 %)                   | 1              | 5  |                    |      |                    |      |
| <i>Erwinia billingiae</i> (99,62 %)               | 1              | 5  |                    |      |                    |      |
| <i>Ewingella americana</i> (99,33-99,42 %)        | 2              | 10 |                    |      |                    |      |
| <i>Halomonas aquamarina</i> (99,52 %)             |                |    | 1                  | 4,5  |                    |      |
| <i>Halomonas boliviensis</i> (99,81 %)            |                |    |                    |      | 1                  | 4,5  |
| <i>Marinobacter litoralis</i> (99,42-100,00 %)    |                |    | 13                 | 59,1 | 2                  | 9,1  |
| <i>Paenalcaligenes suwonensis</i> (99,62-99,71 %) |                |    |                    |      | 2                  | 9,1  |
| <i>Photobacterium lutimaris</i> (98,40-98,80 %)   |                |    |                    |      | 4                  | 18,2 |
| <i>Pseudoalteromonas tetraodonis</i> (99,90 %)    |                |    | 2                  | 9,1  | 4                  | 18,2 |
| <i>Pseudoalteromonas undina</i> (99,52-99,81 %)   |                |    | 4                  | 18,2 | 1                  | 4,5  |
| <i>Pseudomonas azotoformans</i> (99,81 %)         | 1              | 5  |                    |      |                    |      |
| <i>Pseudomonas gessardii</i> (99,81 %)            | 1              | 5  |                    |      |                    |      |
| <i>Pseudomonas kribbensis</i> (99,90 %)           |                |    | 1                  | 4,5  |                    |      |
| <i>Pseudomonas poae</i> (98,84 %)                 | 1              | 5  |                    |      |                    |      |
| <i>Pseudomonas</i> sp. DSM 28142 (99,90 %)        | 1              | 5  |                    |      |                    |      |
| <i>Pseudomonas zhaodongensis</i> (99,71 %)        |                |    | 1                  | 4,5  |                    |      |
| <i>Shewanella arctica</i> (99,05-99,52 %)         | 3              | 15 |                    |      |                    |      |
| <i>Vibrio anguillarum</i> (98,87-99,71 %)         | 4              | 20 |                    |      |                    |      |
| <i>Vibrio kanaloae</i> (96,38-99,52 %)            |                |    |                    |      | 2                  | 9,1  |
| <i>Vibrio toranzoniae</i> (99,42-100,00 %)        | 3              | 15 |                    |      | 6                  | 27,3 |

## References

1. Paterson, K.J.; Schreider, M.J.; Zimmerman, K.D. Anthropogenic effects on seston quality and quantity and the growth and survival of Sydney rock oyster (*Saccostrea glomerata*) in two estuaries in NSW, Australia. *Aquaculture* 2003, 221, 407–426
2. Ramljak A, Vardić Smrzlić I, Kapetanović D, Barac F, Kolda A, Perić L, Balenović I, Klanjšček T, Gavrilović A. Skin Culturable Microbiota in Farmed European Seabass (*Dicentrarchus labrax*) in Two Aquacultures with and without Antibiotic Use. *Journal of Marine Science and Engineering*. 2022; 10(3):303. <https://doi.org/10.3390/jmse10030303>
